# Supplementary material
Source: PubMed Central journal article supplement (PMC4557871)

# Colonies of BMSCs from a patient with mastocytosis

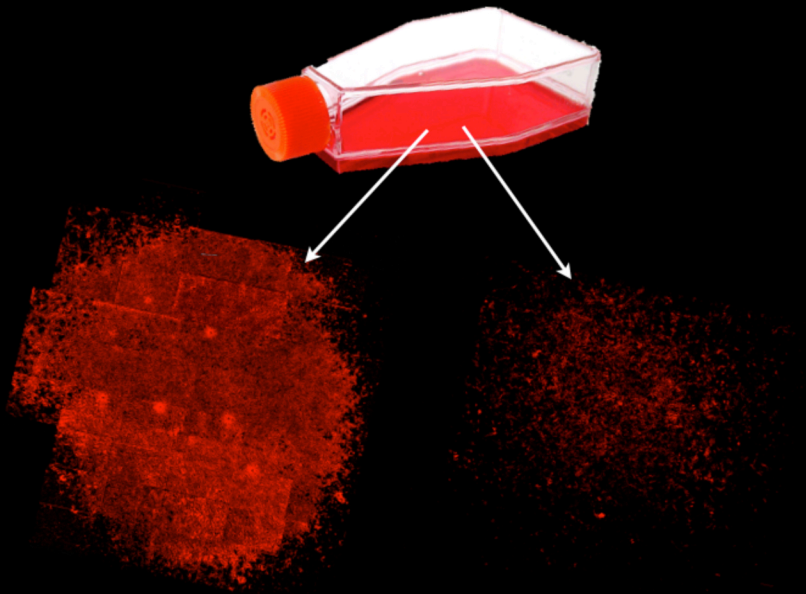

Supplement: NIHMS689099-supplement.pdf [file NIHMS689099-supplement.pdf]
